# Supplementary material for: The transcription factor hepatocyte nuclear factor 4A acts in the intestine to promote white adipose tissue energy storage
Source: PubMed Central journal article supplement (PMC8752770; doi:10.1038/s41467-021-27934-w), 2022-01-11
Supplement: 41467_2021_27934_MOESM1_ESM.pdf [file 41467_2021_27934_MOESM1_ESM.pdf]

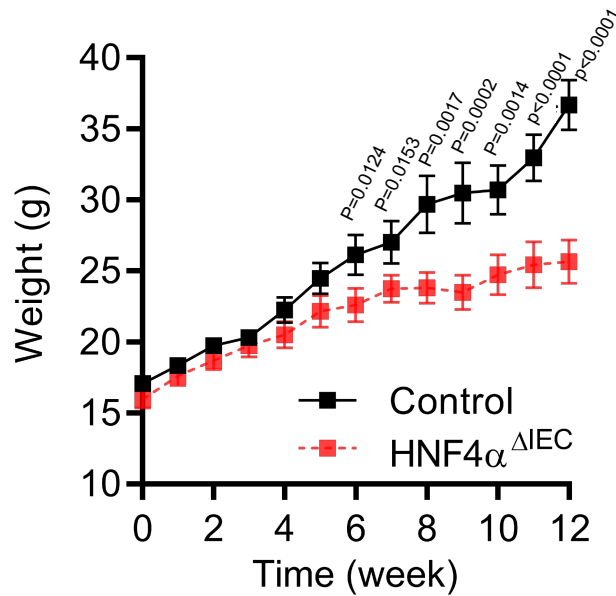

Supplemental Fig. S1: **Female mice lacking intestinal HNF4A were resistant to HFD-induced obesity.** Weight curve of weaned mice fed an HFD for 12 weeks for control (black squares, n = 7) and HNF4A $\Delta IEC$  mutant (red squares, n = 8) mice. Statistical comparisons were performed using two-way ANOVA followed by uncorrected Fisher's LSD test. Data are presented as mean values +/- SEM. Source data are provided as a Source Data file.

**a**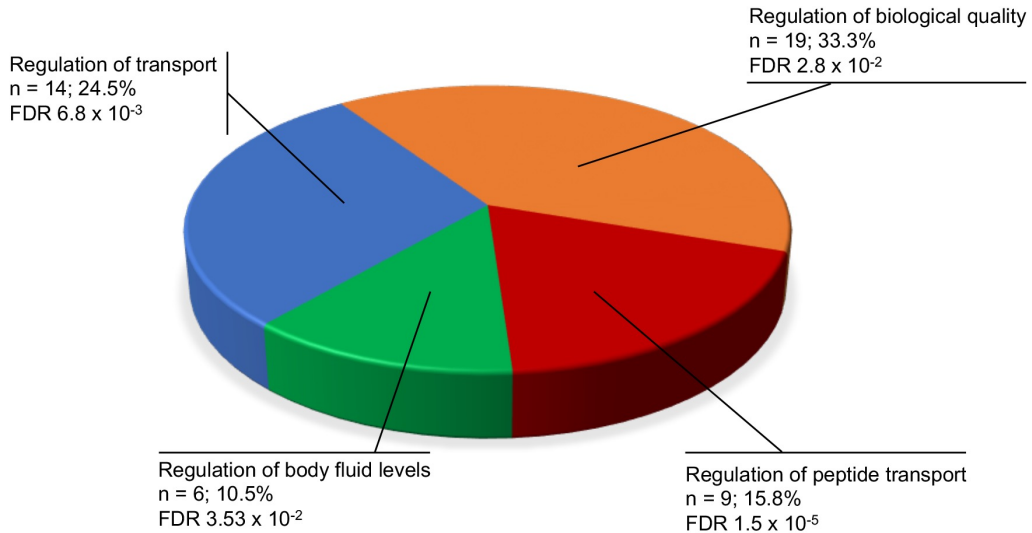**b**

| Gene name                                        | Gene symbol | Protein Class                       |
|--------------------------------------------------|-------------|-------------------------------------|
| Fibrinogen alpha chain                           | Fga         |                                     |
| Carbonic anhydrase 2                             | Car2        |                                     |
| C-C motif chemokine 5                            | Cd5         | cytokine                            |
| Gastric inhibitory polypeptide                   | GIP         | hormone                             |
| Hepatocyte nuclear factor 4-a                    | Hnf4a       | Zinc finger nuclear receptor        |
| Protein FAM3D                                    | Famd3       | Antimicrobial response protein      |
| Immunoglobulin-like domain containing receptor 1 | Ildr1       | Immunoglobulin receptor superfamily |
| Fibrinogen beta chain                            | Fgb         | Intercellular signal molecule       |
| Fibrinogen gamma chain                           | Fgg         | Intercellular signal molecule       |

Supplemental Fig. S2: **Transcriptomic analysis of the jejunum of HNF4A<sup>ΔIEC</sup> mutants under HFD.** **a**, Biological functions associated with transcriptomic changes in the jejunum of HNF4A<sup>ΔIEC</sup> mutants. **b**, List of genes significantly modulated in the jejunum of HNF4A<sup>ΔIEC</sup> mutants and associated with regulation of peptide transport.

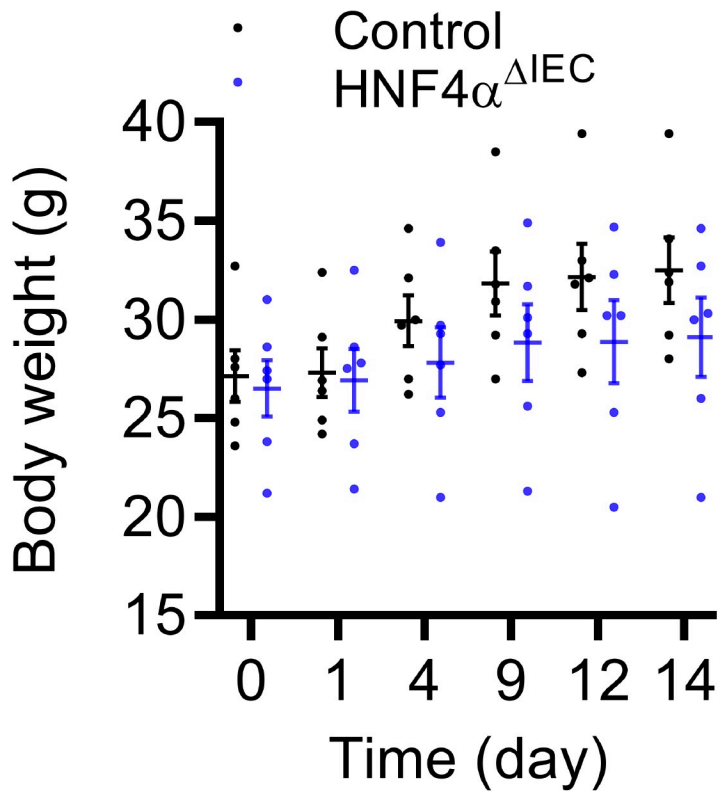

Supplemental Fig. S3: **Individual weight values of control (black points) and HNF4A $\Delta IEC$  mutant (blue points) mice fed an HFD as monitored for 2 weeks (n = 6).** Data are presented as mean values +/- SEM.
