# Supplementary material for: The transcription factor hepatocyte nuclear factor 4A acts in the intestine to promote white adipose tissue energy storage
Source: PubMed Central journal article supplement (PMC8752770; doi:10.1038/s41467-021-27934-w), 2022-01-11
Supplement: 41467_2021_27934_MOESM3_ESM.pdf [file 41467_2021_27934_MOESM3_ESM.pdf]

## Reporting Summary

Nature Portfolio wishes to improve the reproducibility of the work that we publish. This form provides structure for consistency and transparency in reporting. For further information on Nature Portfolio policies, see our [Editorial Policies](#) and the [Editorial Policy Checklist](#).

### Statistics

For all statistical analyses, confirm that the following items are present in the figure legend, table legend, main text, or Methods section.

- | n/a                                 | Confirmed                                                                                                                                                                                                                                                                                      |
|-------------------------------------|------------------------------------------------------------------------------------------------------------------------------------------------------------------------------------------------------------------------------------------------------------------------------------------------|
| <input type="checkbox"/>            | <input checked="" type="checkbox"/> The exact sample size ( $n$ ) for each experimental group/condition, given as a discrete number and unit of measurement                                                                                                                                    |
| <input type="checkbox"/>            | <input checked="" type="checkbox"/> A statement on whether measurements were taken from distinct samples or whether the same sample was measured repeatedly                                                                                                                                    |
| <input type="checkbox"/>            | <input checked="" type="checkbox"/> The statistical test(s) used AND whether they are one- or two-sided<br><i>Only common tests should be described solely by name; describe more complex techniques in the Methods section.</i>                                                               |
| <input checked="" type="checkbox"/> | <input type="checkbox"/> A description of all covariates tested                                                                                                                                                                                                                                |
| <input type="checkbox"/>            | <input checked="" type="checkbox"/> A description of any assumptions or corrections, such as tests of normality and adjustment for multiple comparisons                                                                                                                                        |
| <input type="checkbox"/>            | <input checked="" type="checkbox"/> A full description of the statistical parameters including central tendency (e.g. means) or other basic estimates (e.g. regression coefficient) AND variation (e.g. standard deviation) or associated estimates of uncertainty (e.g. confidence intervals) |
| <input type="checkbox"/>            | <input checked="" type="checkbox"/> For null hypothesis testing, the test statistic (e.g. $F$ , $t$ , $r$ ) with confidence intervals, effect sizes, degrees of freedom and $P$ value noted<br><i>Give <math>P</math> values as exact values whenever suitable.</i>                            |
| <input checked="" type="checkbox"/> | <input type="checkbox"/> For Bayesian analysis, information on the choice of priors and Markov chain Monte Carlo settings                                                                                                                                                                      |
| <input checked="" type="checkbox"/> | <input type="checkbox"/> For hierarchical and complex designs, identification of the appropriate level for tests and full reporting of outcomes                                                                                                                                                |
| <input checked="" type="checkbox"/> | <input type="checkbox"/> Estimates of effect sizes (e.g. Cohen's $d$ , Pearson's $r$ ), indicating how they were calculated                                                                                                                                                                    |

*Our web collection on [statistics for biologists](#) contains articles on many of the points above.*

### Software and code

Policy information about [availability of computer code](#)

#### Data collection

Quality control and adapter trimming of RNA-seq libraries were performed using Trim Galore version 0.6.4\_dev ([https://www.bioinformatics.babraham.ac.uk/projects/trim\\_galore/](https://www.bioinformatics.babraham.ac.uk/projects/trim_galore/)). Reads were aligned with Rsubread version 2.6.2 54 against mouse genome version GRCm38 in pair-end mode. Low-count genes were filtered with DESeq2 version 1.32.0 and differential expression analysis was performed using edgeR version 3.34.0. Amide software v.1.0.5 was used for PET/CT acquisition. Indirect calorimetry raw data were processed using ExpeData v. 1.8.4 (Sable Systems, Las Vegas, NV).

#### Data analysis

Adipocyte histomorphology was analyzed using CellProfiler (<https://cellprofiler.org>). Raw cel files from affymetrix microarrays were analyzed using Transcriptome Analysis Console (TAC) software (ThermoFisher Scientific). GSEA was used for transcriptome analyses (<http://www.gseamsigdb.org/gsea/index.jsp>). GO transcriptomic analyses were also analysed with DAVID version 6.8 (<https://david.ncicrf.gov>). Statistical analyses were performed and graphics were produced using GraphPad Prism 8 software.

For manuscripts utilizing custom algorithms or software that are central to the research but not yet described in published literature, software must be made available to editors and reviewers. We strongly encourage code deposition in a community repository (e.g. GitHub). See the Nature Portfolio [guidelines for submitting code & software](#) for further information.

## Data

Policy information about [availability of data](#)

All manuscripts must include a [data availability statement](#). This statement should provide the following information, where applicable:

- Accession codes, unique identifiers, or web links for publicly available datasets
- A description of any restrictions on data availability
- For clinical datasets or third party data, please ensure that the statement adheres to our [policy](#)

Microarray data are accessible through GEO series accession number GSE147105. RNA-seq data are accessible through GEO series accession number (GSE189439). The website for GSEA is available on <https://www.gsea-msigdb.org/gsea/index.jsp>.

## Field-specific reporting

Please select the one below that is the best fit for your research. If you are not sure, read the appropriate sections before making your selection.

- Life sciences       Behavioural & social sciences       Ecological, evolutionary & environmental sciences

For a reference copy of the document with all sections, see [nature.com/documents/nr-reporting-summary-flat.pdf](https://www.nature.com/documents/nr-reporting-summary-flat.pdf)

## Life sciences study design

All studies must disclose on these points even when the disclosure is negative.

|                 |                                                                                                                                                          |
|-----------------|----------------------------------------------------------------------------------------------------------------------------------------------------------|
| Sample size     | <input type="text" value="No sample-size calculation was performed. The sample sizes were chosen accordingly to what is done from comparable studies."/> |
| Data exclusions | <input type="text" value="No data were excluded from this study."/>                                                                                      |
| Replication     | <input type="text" value="All attempts at replication were successful."/>                                                                                |
| Randomization   | <input type="text" value="Mutant and control mice were randomly distributed into treatment or non-treatment groups."/>                                   |
| Blinding        | <input type="text" value="Investigators were blinded to group allocation during data collection."/>                                                      |

## Reporting for specific materials, systems and methods

We require information from authors about some types of materials, experimental systems and methods used in many studies. Here, indicate whether each material, system or method listed is relevant to your study. If you are not sure if a list item applies to your research, read the appropriate section before selecting a response.

### Materials & experimental systems

- |                                     |                                                                 |
|-------------------------------------|-----------------------------------------------------------------|
| n/a                                 | Included in the study                                           |
| <input type="checkbox"/>            | <input checked="" type="checkbox"/> Antibodies                  |
| <input type="checkbox"/>            | <input checked="" type="checkbox"/> Eukaryotic cell lines       |
| <input checked="" type="checkbox"/> | <input type="checkbox"/> Palaeontology and archaeology          |
| <input type="checkbox"/>            | <input checked="" type="checkbox"/> Animals and other organisms |
| <input checked="" type="checkbox"/> | <input type="checkbox"/> Human research participants            |
| <input checked="" type="checkbox"/> | <input type="checkbox"/> Clinical data                          |
| <input checked="" type="checkbox"/> | <input type="checkbox"/> Dual use research of concern           |

### Methods

- |                                     |                                                 |
|-------------------------------------|-------------------------------------------------|
| n/a                                 | Included in the study                           |
| <input checked="" type="checkbox"/> | <input type="checkbox"/> ChIP-seq               |
| <input checked="" type="checkbox"/> | <input type="checkbox"/> Flow cytometry         |
| <input checked="" type="checkbox"/> | <input type="checkbox"/> MRI-based neuroimaging |

## Antibodies

|                 |                                                                                                                                                                                                                                                                                     |
|-----------------|-------------------------------------------------------------------------------------------------------------------------------------------------------------------------------------------------------------------------------------------------------------------------------------|
| Antibodies used | <input type="text" value="anti-ADFP (1:500, abcam, Ab52356)."/>                                                                                                                                                                                                                     |
| Validation      | <input type="text" value="This antibody reacts with mouse and human epitopes and was validated for IHC by abcam cie (https://www.abcam.com/adfp-antibody-ab52356.html). As stated on their datasheets, every batches are confirmed for specificity through extensive validation."/> |

## Eukaryotic cell lines

Policy information about [cell lines](#)

|                     |                                   |
|---------------------|-----------------------------------|
| Cell line source(s) | <input type="text" value="ATCC"/> |
|---------------------|-----------------------------------|

|                                                                      |                                                                                               |
|----------------------------------------------------------------------|-----------------------------------------------------------------------------------------------|
| Authentication                                                       | Used within 1 year of acquisition. No authentication was done after purchasing the cell line. |
| Mycoplasma contamination                                             | The cell line was negative from mycoplasma contamination.                                     |
| Commonly misidentified lines<br>(See <a href="#">ICLAC</a> register) | Not applicable                                                                                |

## Animals and other organisms

Policy information about [studies involving animals](#); [ARRIVE guidelines](#) recommended for reporting animal research

|                         |                                                                                                                                      |
|-------------------------|--------------------------------------------------------------------------------------------------------------------------------------|
| Laboratory animals      | C57BL/6 female and male mice aged between 3 to 6 months                                                                              |
| Wild animals            | This study did not involve wild animals                                                                                              |
| Field-collected samples | This study did not involve samples collected from the field                                                                          |
| Ethics oversight        | All procedures were approved by the Institutional Animal Research Review Committee of the Université de Sherbrooke (approval 102-18) |

Note that full information on the approval of the study protocol must also be provided in the manuscript.
